# Supplementary material for: Harmonizing Movements and Messages: A Traditional Dance Performance Arts-Inspired AIDA Model for Promoting Sustainable Behavior and Effective Marketing Sustainability Communication
Source: Preprints.org preprint supplement (doi:10.20944/preprints202401.1833.v1), 2024-01-25
Supplement: Supplementary file 1 [file supplementary]

**Supplementary Materials**

| Little fish costume: | Orange with sequins | |
| --- | --- | --- |
| Props: | Ocean (long flowing fan with blue and white gradient dye) + Fish Spitting Pearls (Polystyrene sequin ball) | |
| 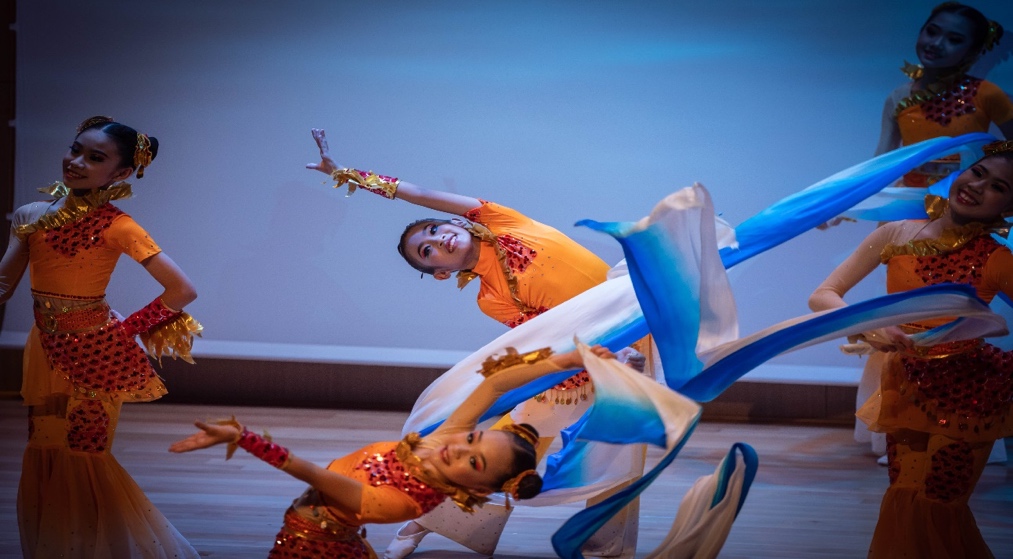  (a) | | |
| 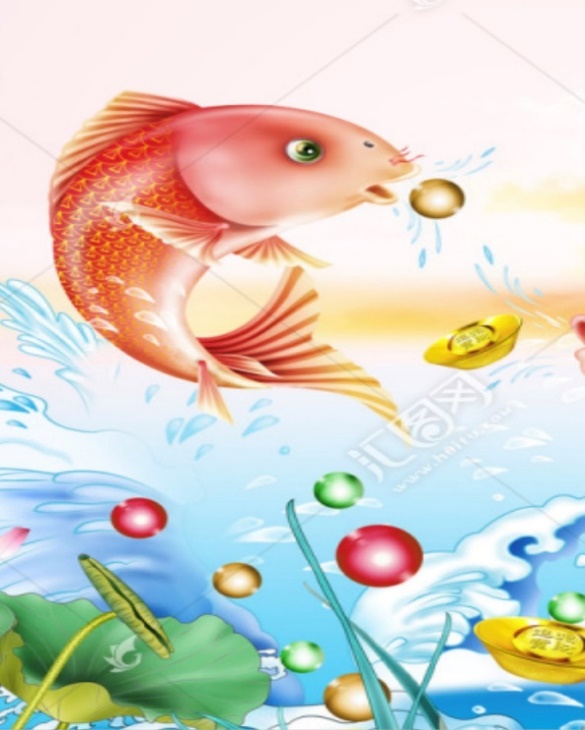  (b) | | 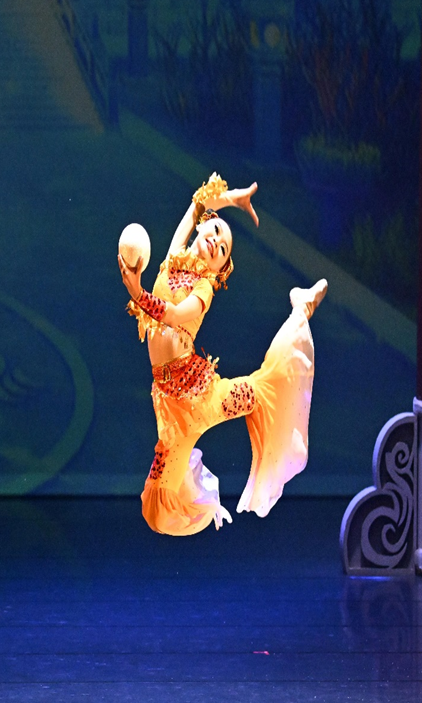  (c) |
| Figure a-c. Ocean and Fish Spitting Pearls Representing the Piece of Underwater Life Where the Fish Dancing Happily | | |

| Dragon King Costume: | Green Dragon Robe |
| --- | --- |
| Props: | Dragon Head Headdress |
| 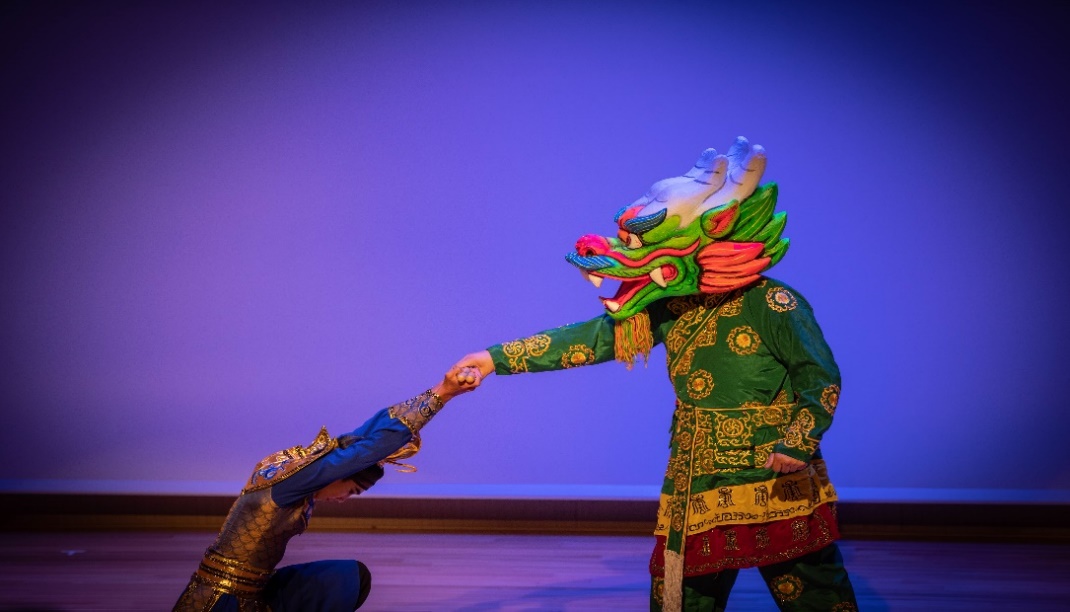  (d) | |
| Figure d. Dragon Costume and Soldier, Representing the Dragon is a Master of the Ocean | |

| Sea Spirit Performance Costume: | Bare Torso with Blue Pants / White Attire | |
| --- | --- | --- |
| Performance Props: | Glow-in-the-dark Tambourine/Magical Cube | |
| 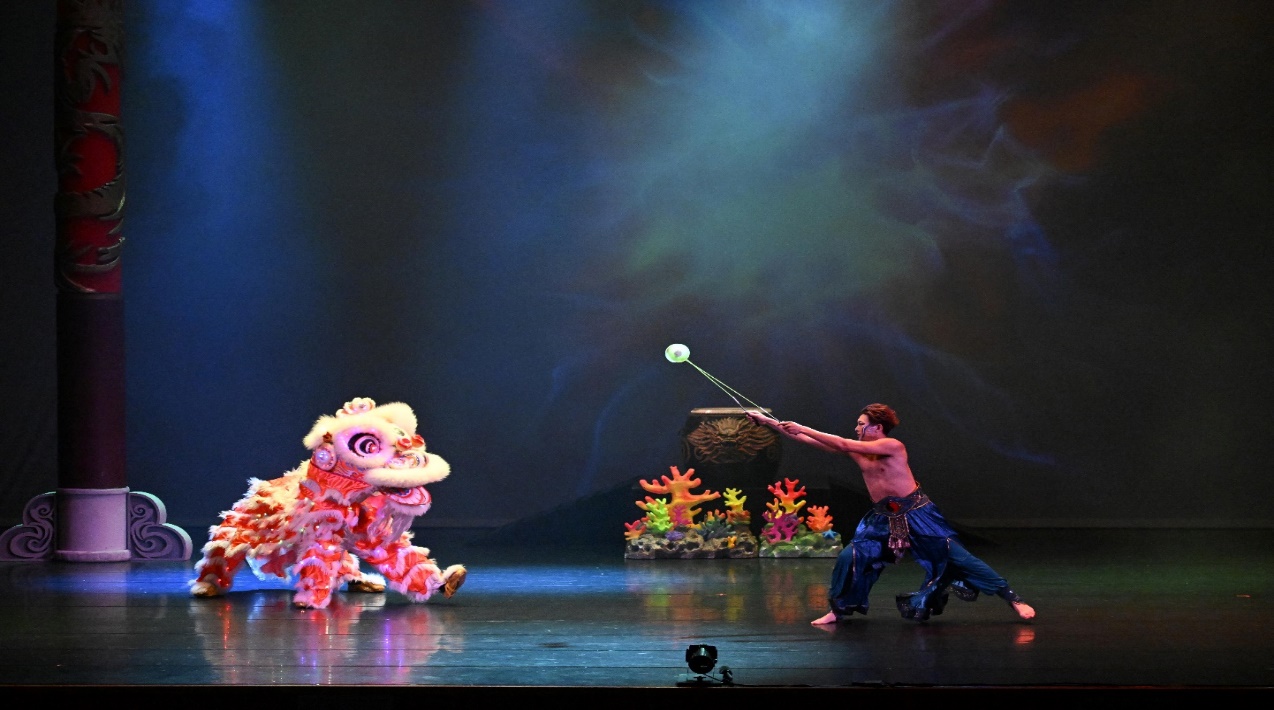  (e) | | 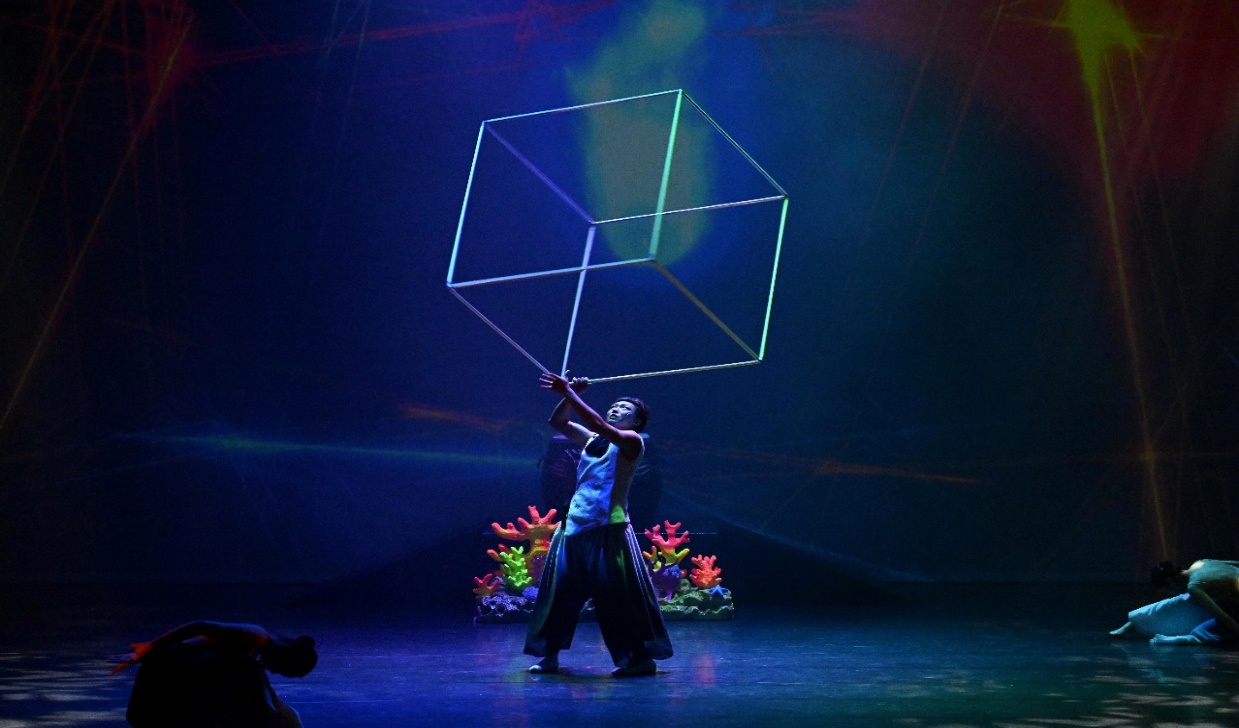  (f) |
| Figure e & f. Representing the Destruction of Underwater Life and Dragon Palace by the Many Kind of Trash | | |

| Sea Beast Costume: | Guandong Lion Custome (Robe and Pants) |
| --- | --- |
| Props: | Lion Head Headdress |
| 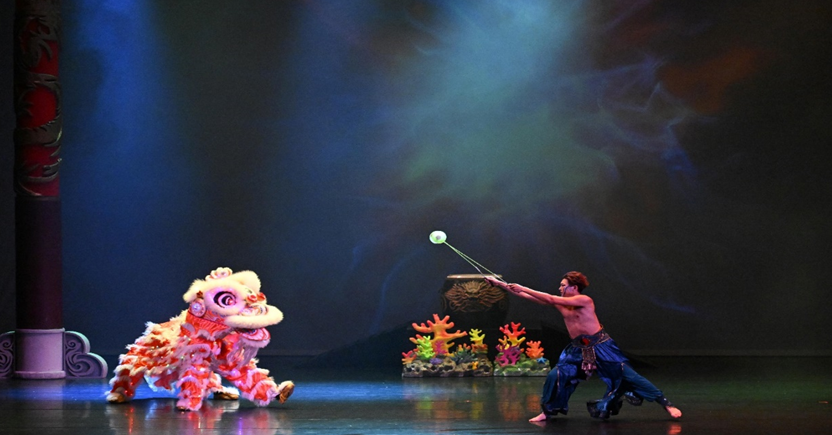  (g) | |
| Figure g. Sea Beast Represent the Actor Who Bring the Destruction | |

| Ocean Wave Costume: | Blue Pants Skirt | |
| --- | --- | --- |
| Props: | Long Flowing fan with Dep Blue and White Gradient Dye | |
| 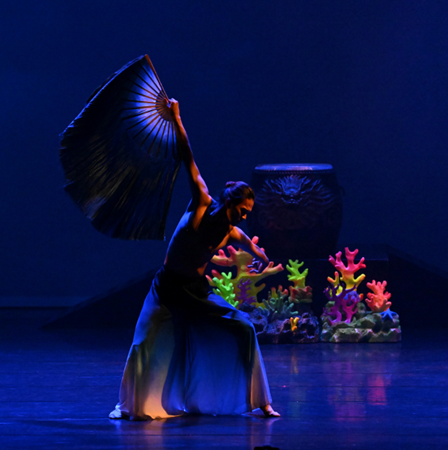  (h) | | 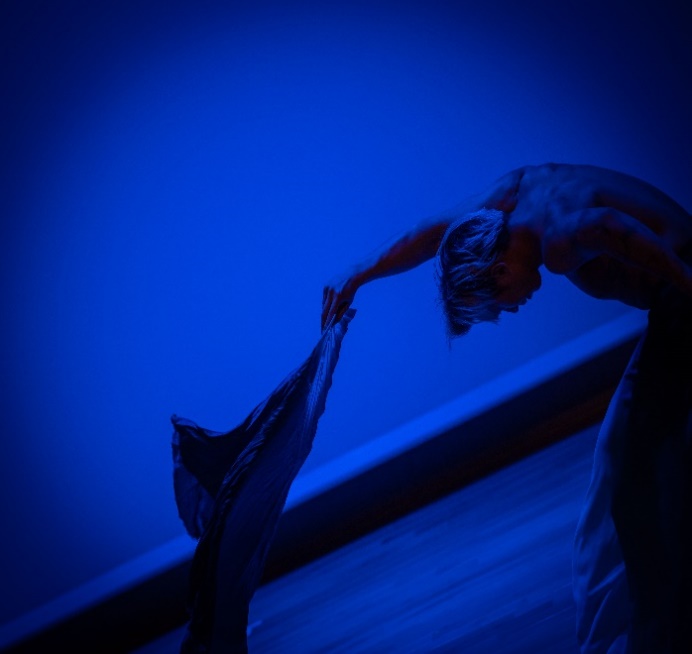  (i) |
| Figure h & i. The Ocean Dynamics | | |

| Shrimp Soldiers and Crab General Costume: | | Dark Blue and Light Blue Battle Robes |
| --- | --- | --- |
| Props: | | Oriental Big Drum, Large and Small Golden Battle Flags |
| 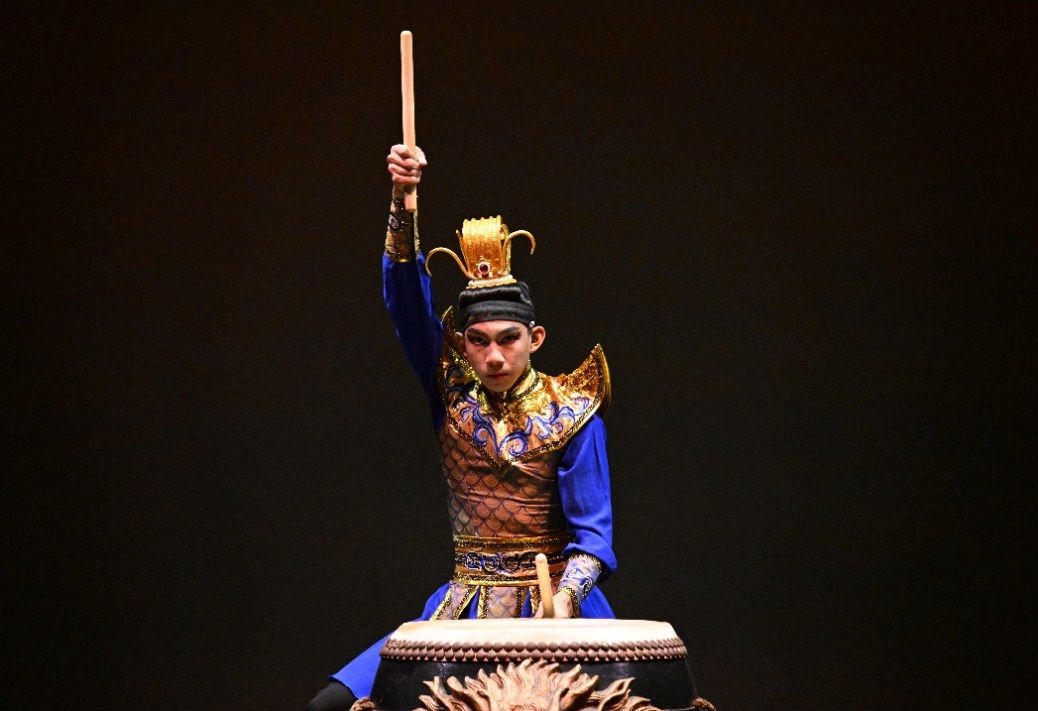  (j) | 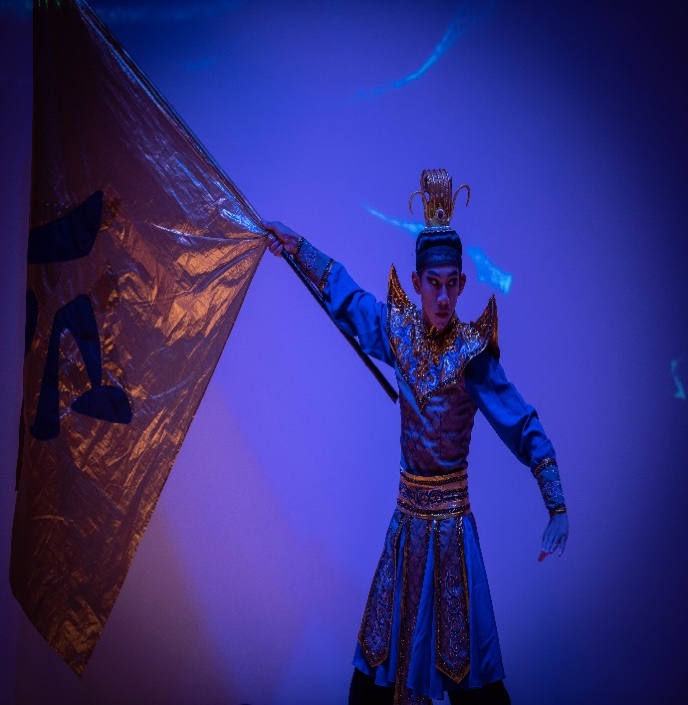  (k) | |
| 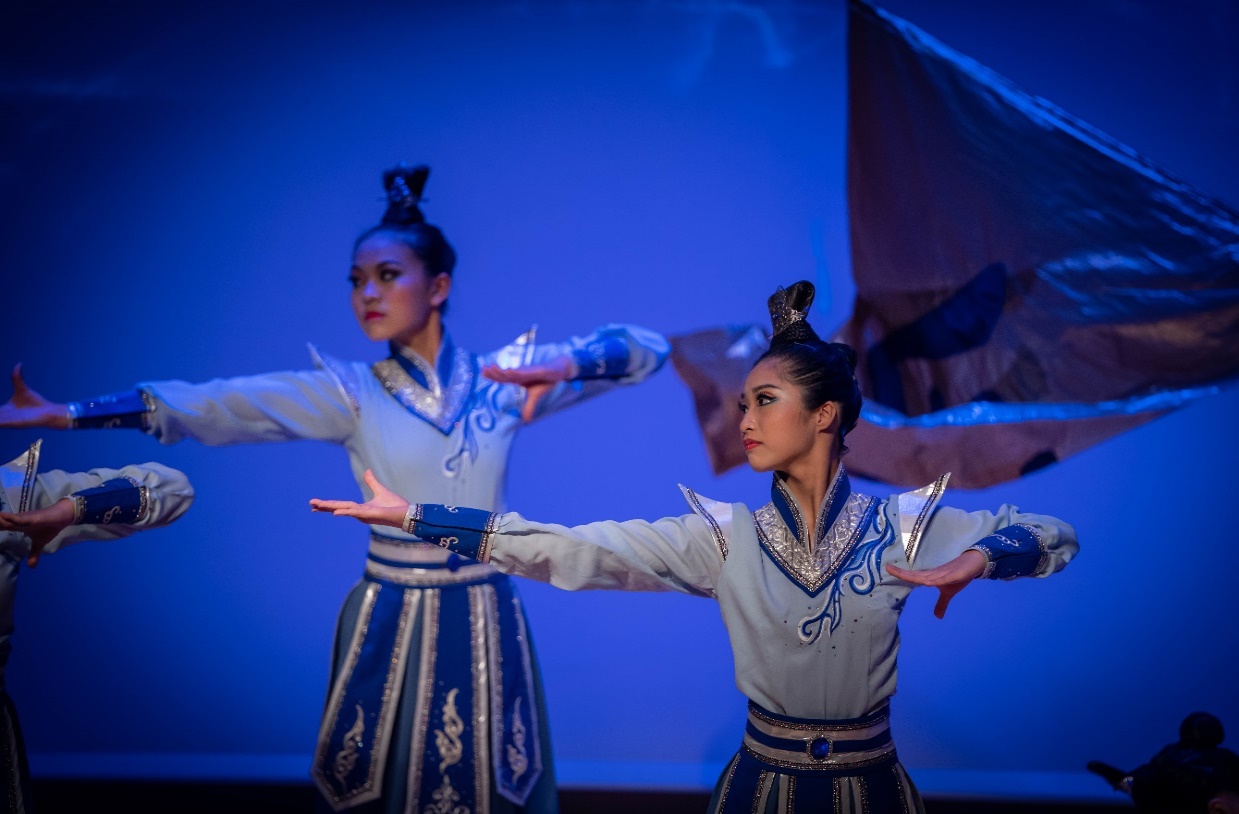  (l) | | |
| Figure j-l. Soldiers of Dragon Palace Who Fights Against Sea Beast and Clean the Water | | |

| Celebration Performance Costume: | Orang Top, Purple Pants Performance | |
| --- | --- | --- |
| Props: | Drum, Cymbals, Offering of Fruits for Ritual, Red Embroidered Ball with Ribbons | |
| 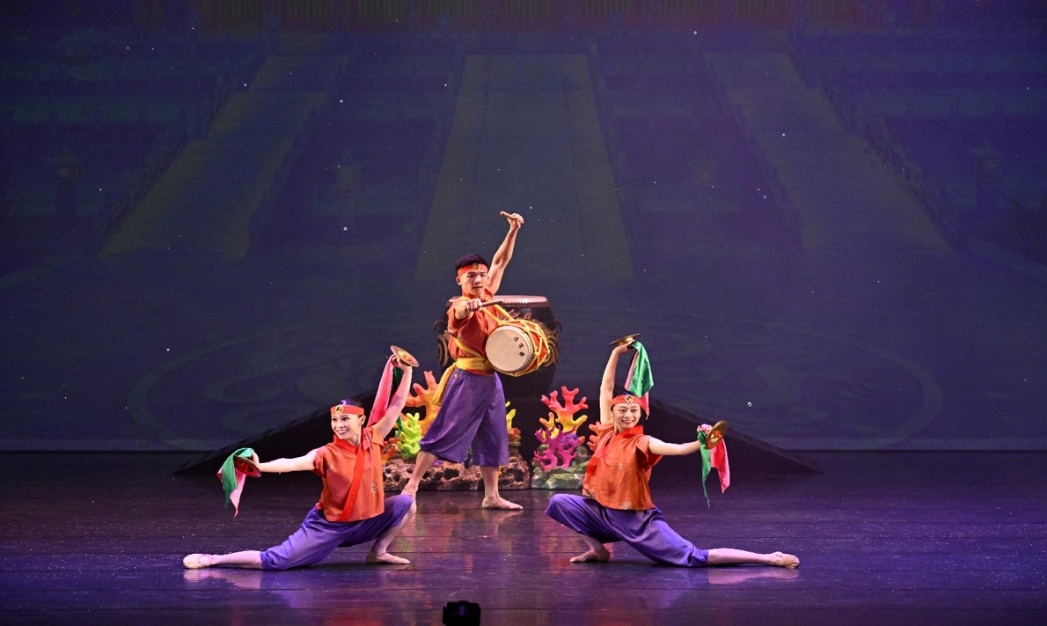  (m) | | 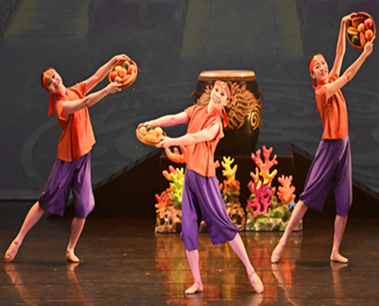  (n) |
| 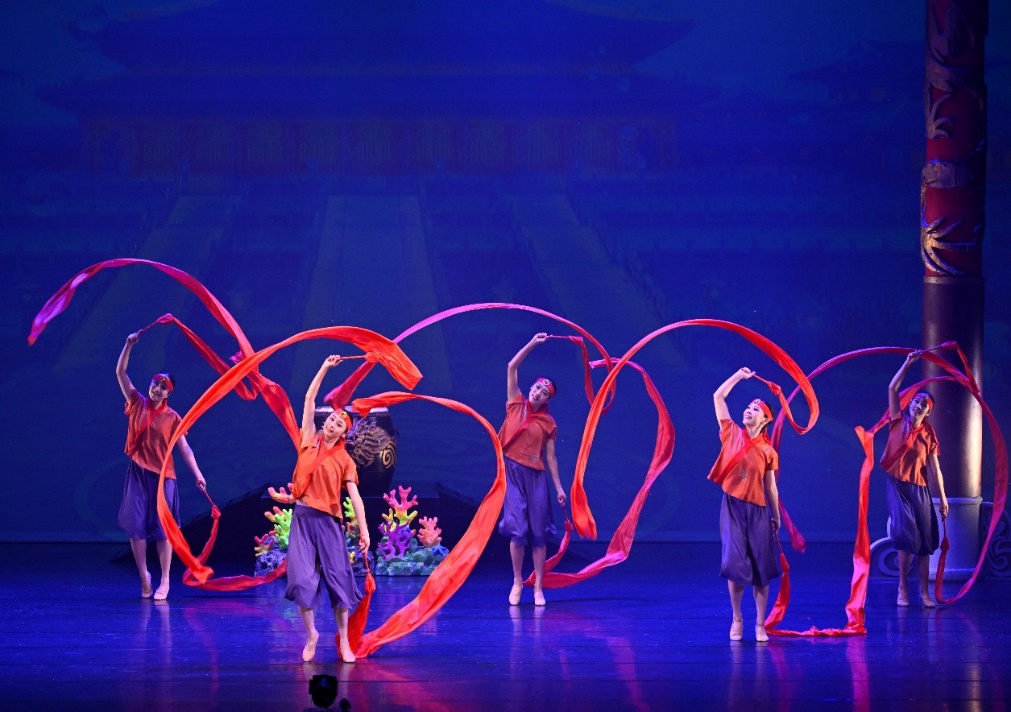  (o) | | |
| 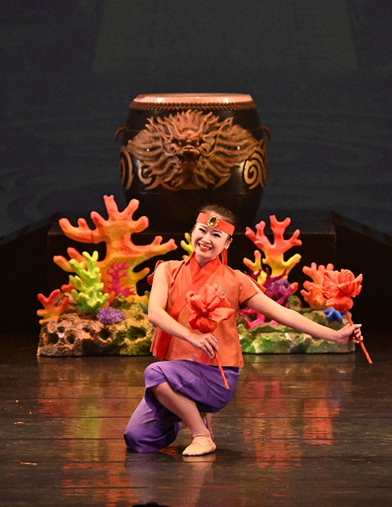  (p) | | |
| Figure m-p. Representing the Celebration After the Soldiers Won the Fights to Defend Dragon Palace and Brought Happiness to Underwater Life | | |
